# Supplementary material for: CD8 T cells induce the peritubular capillary rarefaction during AKI to CKD transition
Source: PubMed Central journal article supplement (PMC11186369; doi:10.7150/ijbs.96812), 2024-05-19
Supplement: ijbsv20p2980s1.pdf [file ijbsv20p2980s1.pdf]

**SUPPLEMENTARY MATERIALS:****Supplementary Table 1. Gene information in the enriched pathway of CD8 T cells after GO analysis.**

| Term                                                                  | Count | PValue   | Genes                                                                                                                        |
|-----------------------------------------------------------------------|-------|----------|------------------------------------------------------------------------------------------------------------------------------|
| GO:0002376~Immune system process                                      | 18    | 3.24E-10 | SLFN2, CD160, H2-Q7, SH2D1A, ARID5A, THEMIS, CD8B1, CD3G, SERPINA3G, CD3E, CD3D, PSMB8, PSMB9, JAML, CD8A, CD7, PDCD1, SKAP1 |
| GO:0002250~Adaptive immune response                                   | 13    | 3.86E-09 | SLFN2, CD160, SH2D1A, THEMIS, CD8B1, CD3G, SERPINA3G, CD3E, CD3D, CD8A, CD7, PDCD1, SKAP1                                    |
| GO:0006915~Apoptotic process                                          | 9     | 0.009337 | FASL, IFI27, SH3KBP1, BCL2, CD27, GZMB, PDCD1, LSP1, SERPINA3G                                                               |
| GO:0007155~Cell adhesion                                              | 8     | 0.019671 | SELPLG, ITGA4, JAML, LAMB3, ITGA1, CD226, ITGAE, THY1                                                                        |
| GO:0006955~Immune response                                            | 7     | 0.030113 | FASL, CCL5, H2-Q7, H2-M3, CXCR6, CST7, CCR5                                                                                  |
| GO:0006508~Proteolysis                                                | 7     | 0.050915 | GZMK, GZMB, CTSW, KLK8, PSMB8, CTSC, PSMB9                                                                                   |
| GO:0051603~Proteolysis involved in cellular protein catabolic process | 6     | 1.89E-05 | CTLA2A, GZMB, CTSW, PSMB8, CTSC, PSMB9                                                                                       |
| GO:0034097~Response to cytokine                                       | 6     | 3.14E-05 | SP100, CCL5, BCL2, ACP5, SERPINA3G, CORO1A                                                                                   |
| GO:0032729~Positive regulation of interferon-gamma production         | 6     | 4.43E-05 | CD160, H2-M3, ARID5A, CD27, CD226, CD3E                                                                                      |
| GO:0006935~Chemotaxis                                                 | 6     | 3.64E-04 | CMTM7, CCL5, RAC2, CXCR6, LSP1, CCR5                                                                                         |

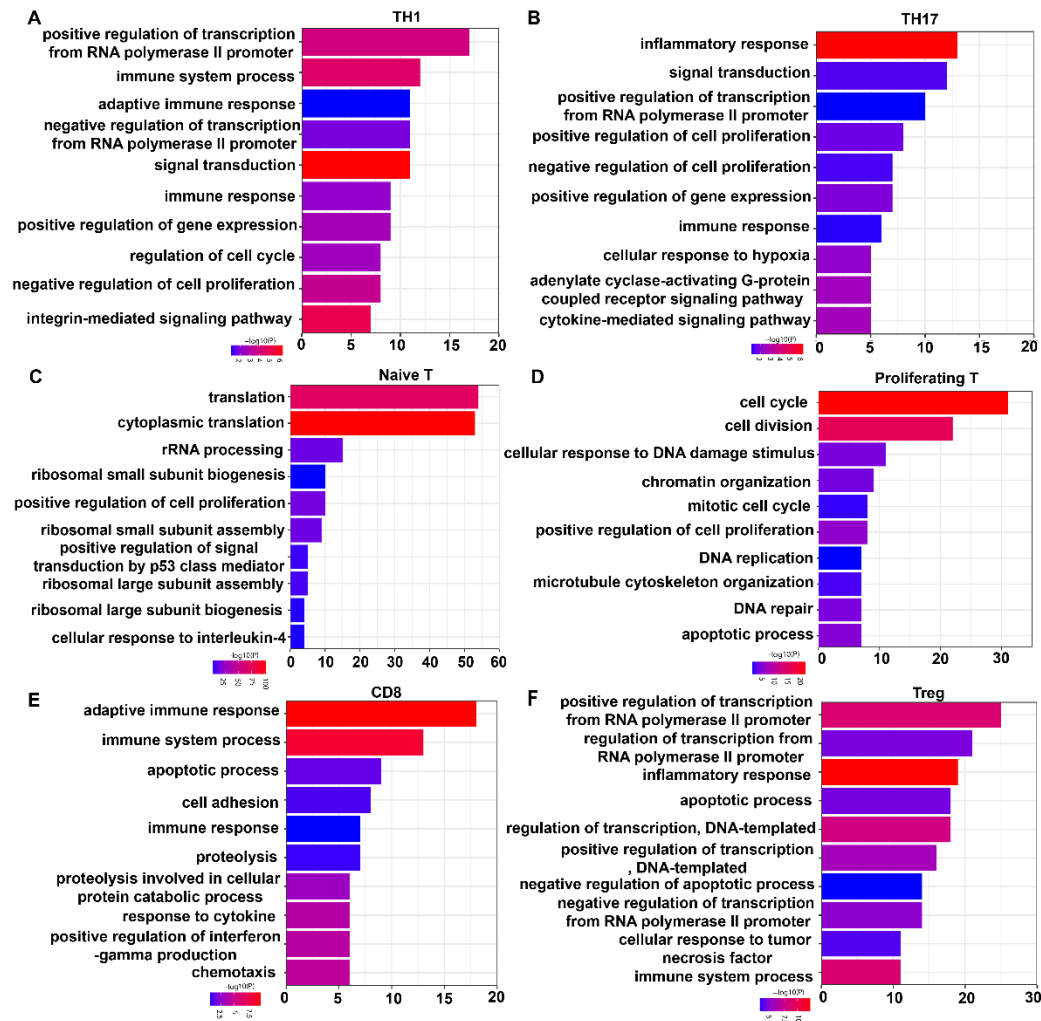

Supplementary Figure 1. **The disparate function of T cell clusters during AKI to CKD.**

(a-f) GO pathway analysis of the top 10 upregulated pathways in TH1, TH17, naive, Proliferating T, CD8, and Treg cluster, ranked by *counts*.

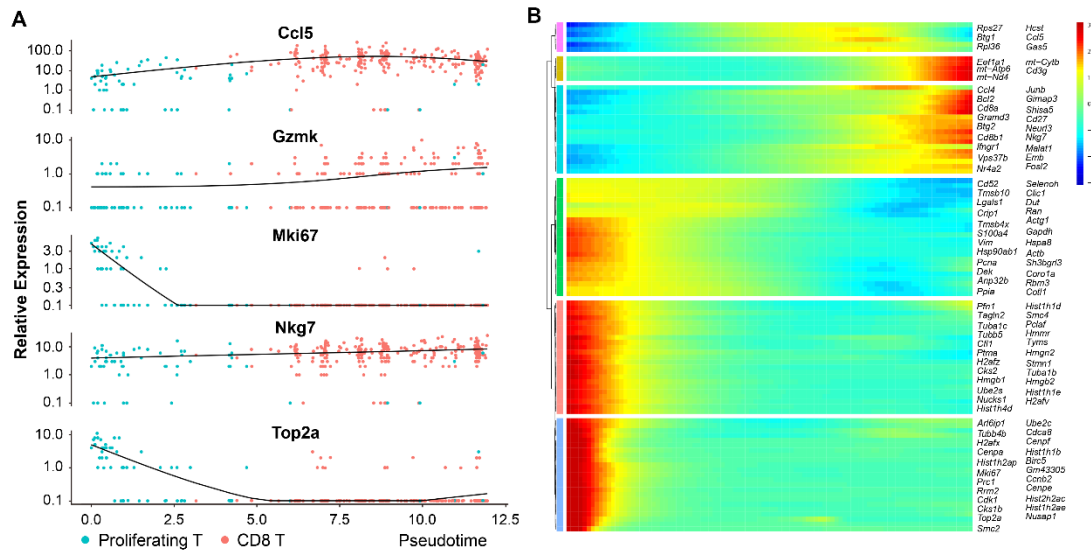

Supplementary Figure 2. **The dynamic changes of important genes and the pseudo time during the transition of proliferating T to CD8 T cells.**

(a) Expression dynamics of unique representative genes Ccl5, GzmK, Mki67, Nkg7, and Top2a analyzed using Monocle 2 after AKI. (b) Heatmap showing important genes involved in cell-state transitions after AKI.

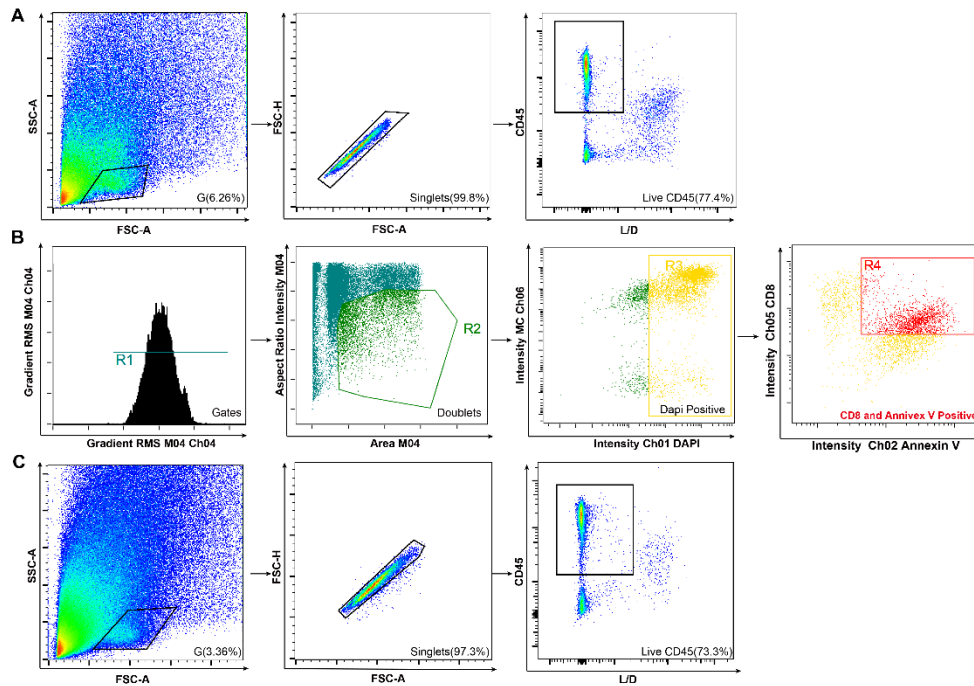

Supplementary Figure 3. **Gating strategy for renal live CD45<sup>+</sup> cells or CD8<sup>+</sup>, Annexin V<sup>+</sup>, and DAPI<sup>+</sup> doublets.**

- (a) Gating strategy of single cell suspensions of kidneys from 3 and 14-day uIRI model (FSC, forward scatter; SSC, side scatter; L/D, live or dead.). (b) Gating strategy for selecting doublets in CD8 T and endothelial cells, and then analysis of CD8<sup>+</sup>, Annexin V<sup>+</sup>, and DAPI<sup>+</sup> doublets.
- (c) Gating strategy of single cell suspensions of kidneys from sham, uIRI 14D model treated with CD8 $\alpha$  mAb, and the Isotype control group.

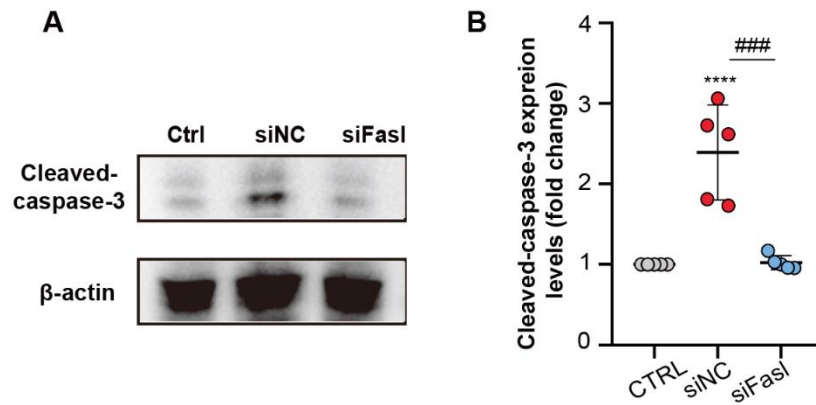

Supplementary Figure 4. **CD8 T cells induced the apoptosis of endothelial cells through FasI-Fas signaling.**

(a) Western blot analysis was conducted to assess the levels of cleaved-caspase-3 protein in endothelial cells co-cultured with CD8 T cells, transfected with either FasI siRNA or NC siRNA.

(b) The protein levels of cleaved-caspase-3 in sham kidneys of endothelial cells were quantified under similar conditions. Data are presented as means  $\pm$  SD. \*\*\*\*  $P < 0.0001$  compared to control group; ###  $P < 0.001$  compared to CD8 T cells transfected with NC siRNA group.

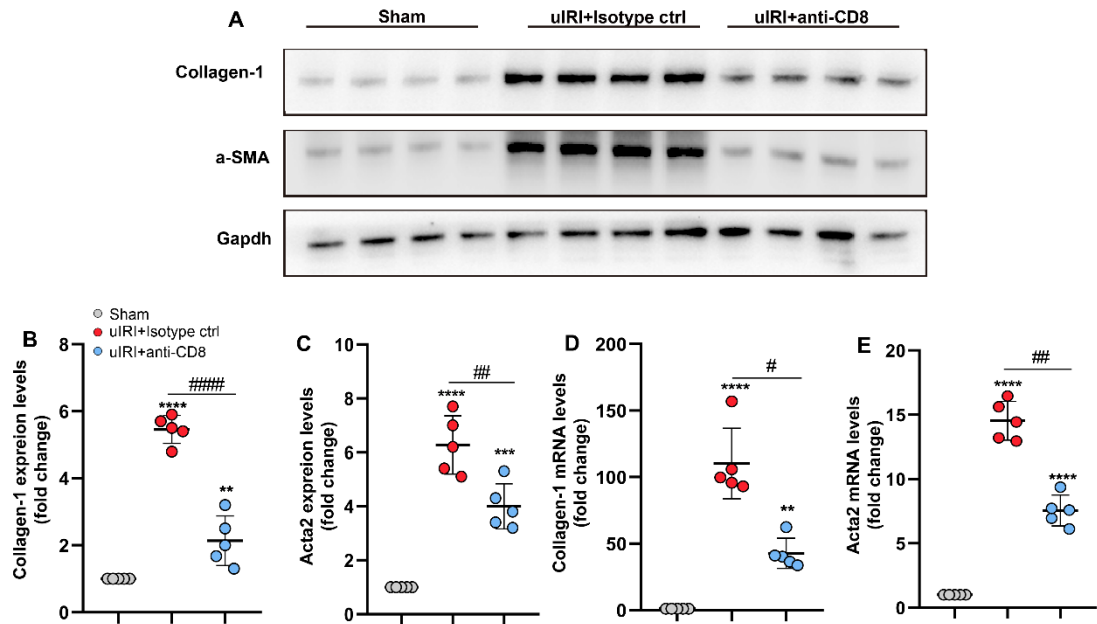

Supplementary Figure 5. **CD8 T cells depletion alleviates renal fibrosis.**

(a) Western blot analysis of Collagen-1 and a-SMA protein levels in the kidneys of sham, uIRI 14D mice treated with Isotype control or anti-CD8 $\alpha$  mAb. (b, c) Quantifying the protein levels of Collagen-1 and a-SMA in sham kidneys, uIRI 14D mice treated with Isotype control or anti-CD8 $\alpha$  mAb. (d, e) Quantifying the mRNA levels of Acta2 and Collagen-1 in sham kidneys, uIRI 14D mice treated with Isotype control or anti-CD8 $\alpha$  mAb. Data are presented as means  $\pm$  SD. \*\* $P < 0.01$ , \*\*\*  $P < 0.001$ , \*\*\*\*  $P < 0.0001$  compared to sham group; #  $P < 0.05$ , ##  $P < 0.01$ , ####  $P < 0.0001$  compared to uIRI model treated with Isotype Control.
